# Supplementary material
Source: PubMed Central journal article supplement (PMC9670002)
Supplement: sj-pdf-1-jcb-10.1177_0271678X221119288.pdf [file sj-pdf-1-jcb-10.1177_0271678X221119288.pdf]

**Supplementary figures and legends, Drieu et al.**

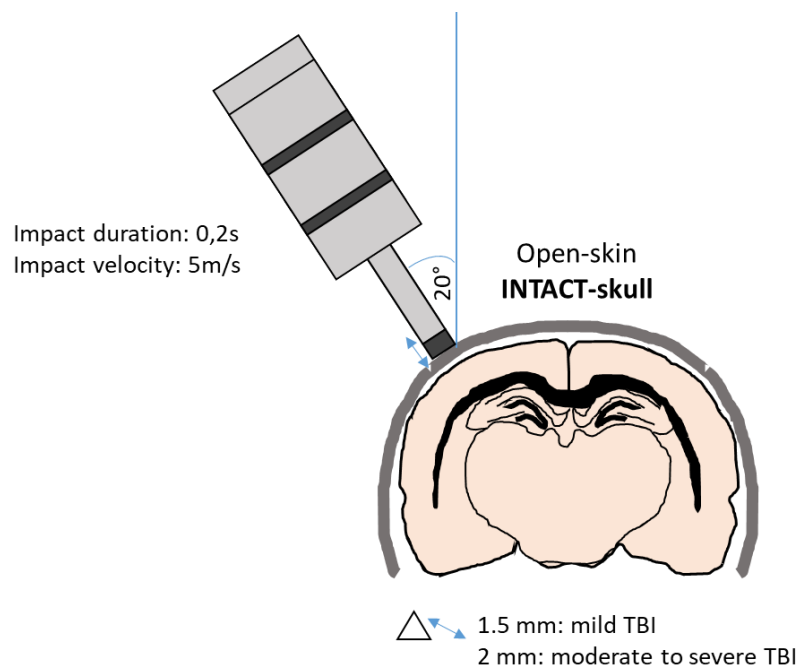

**Figure S1.** Schematic representation of the model of TBI.

## Respiratory arrest after TBI

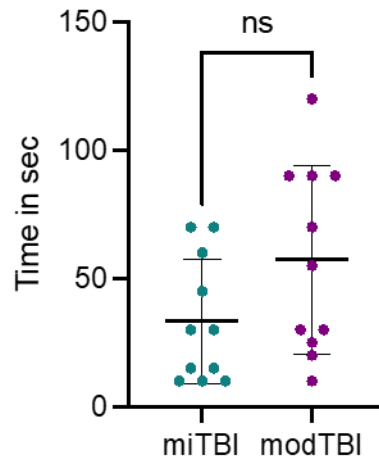

**Figure S2.** Respiratory arrest after mTBI. Mice were put in a recovery box following mi- or modTBI. The time when mice got their first breath was manually recorded. n=10/11 mice/group,  $p=0.1024$ , Mann-Whitney test.

LPS + 24h

**A**

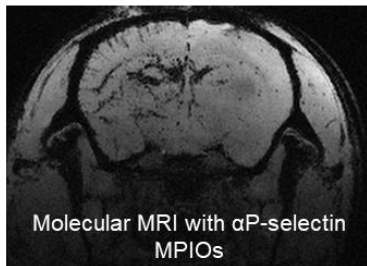

**B**

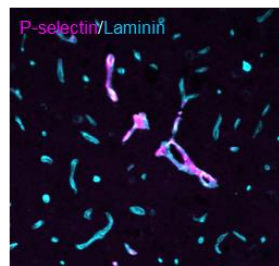

**C**

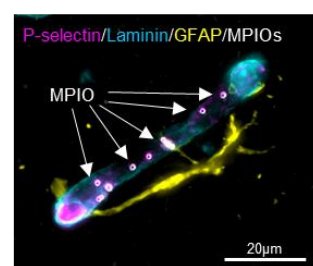

Severe TBI d+7

**D**

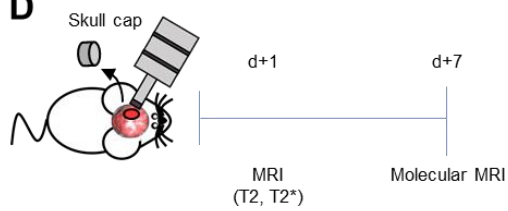

**E**

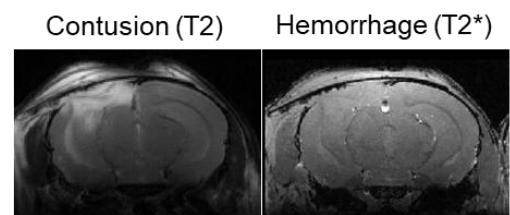

**F**

Molecular MRI for P-selectin

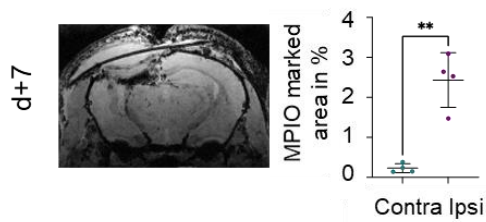

**G**

IHC for P-selectin d+7

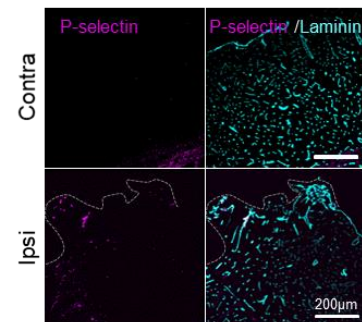

**H**

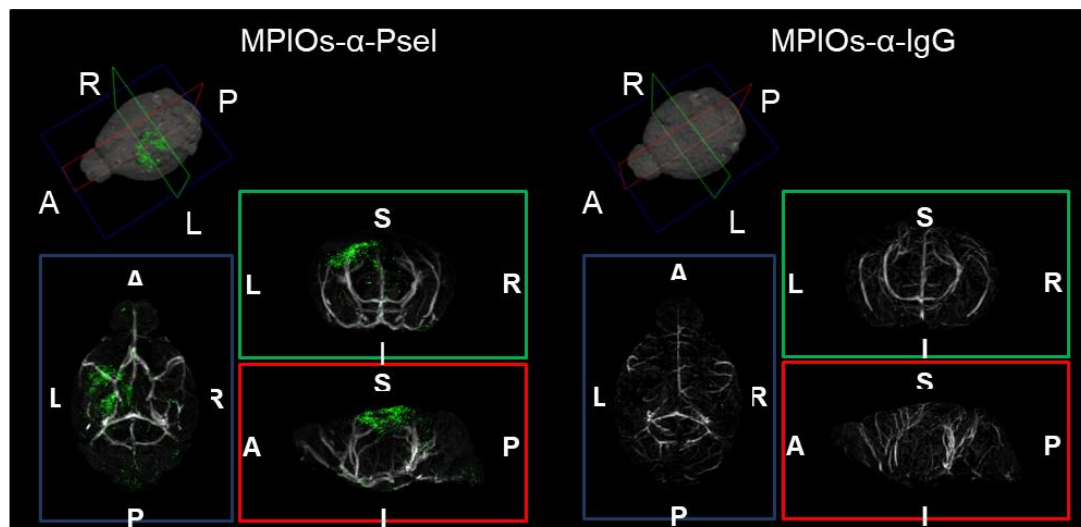

**Figure S3.** Controls for molecular MRI. (A) Representative T2\*-GEFC  $\alpha$ P-selectin MPIO acquisitions 24h after intrastriatal injection of LPS. (B) Representative P-selectin immunostaining 24h after intrastriatal injection of LPS. (C) Localization of P-selectin-MPIOs in a brain blood vessel of a mouse 24h after intrastriatal injection of LPS. (D) Schematic representation of the experimental design showing that severe TBI was induced after craniectomy. (E) Representative T2-weighted and T2\*-weighted MRI acquisitions in mice 24 hours after severe TBI. (H) Representative projection of signal obtained with MPIOs coupled to either an antibody against P-selectin, or a control immunoglobulin. Signals are mapped on a template and on the corresponding angiography. (F) Representative T2\*-GEFC  $\alpha$ P-selectin MPIO acquisitions 7 days after severe TBI and its MPIO-marked area quantifications. (G) Representative photomicrographs of P-selectin immunostaining 7 days after sTBI (blood vessels were stained with laminin).

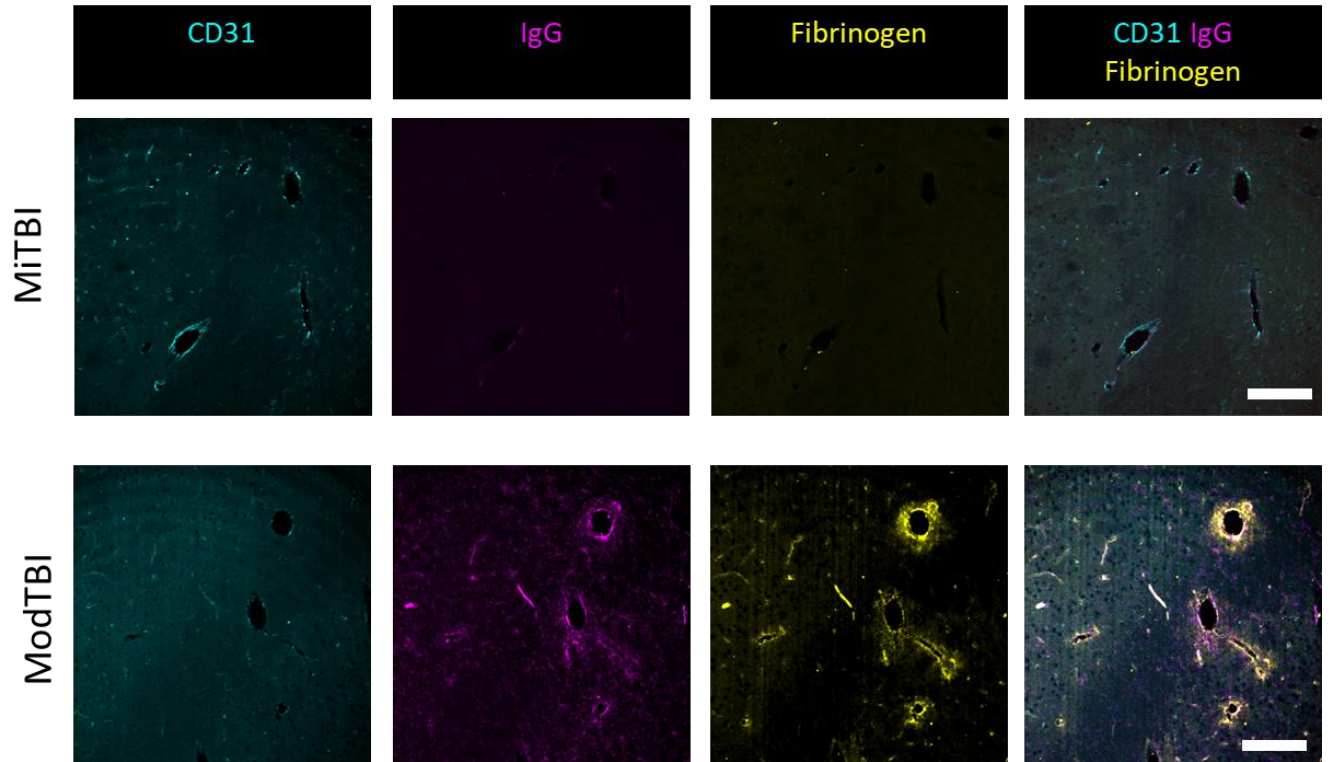

**Figure S4.** Mild TBI does not induce BBB leakage after 24h in contrast to moderate TBI. Representative immunostainings for CD31, fibrinogen and immunoglobulin extravasation after mild or moderate TBI (n=4 animals per group). Scale bar: 100 $\mu$ m.

## neuro-inflammatory response in Sham, mild TBI, moderate TBI d+1

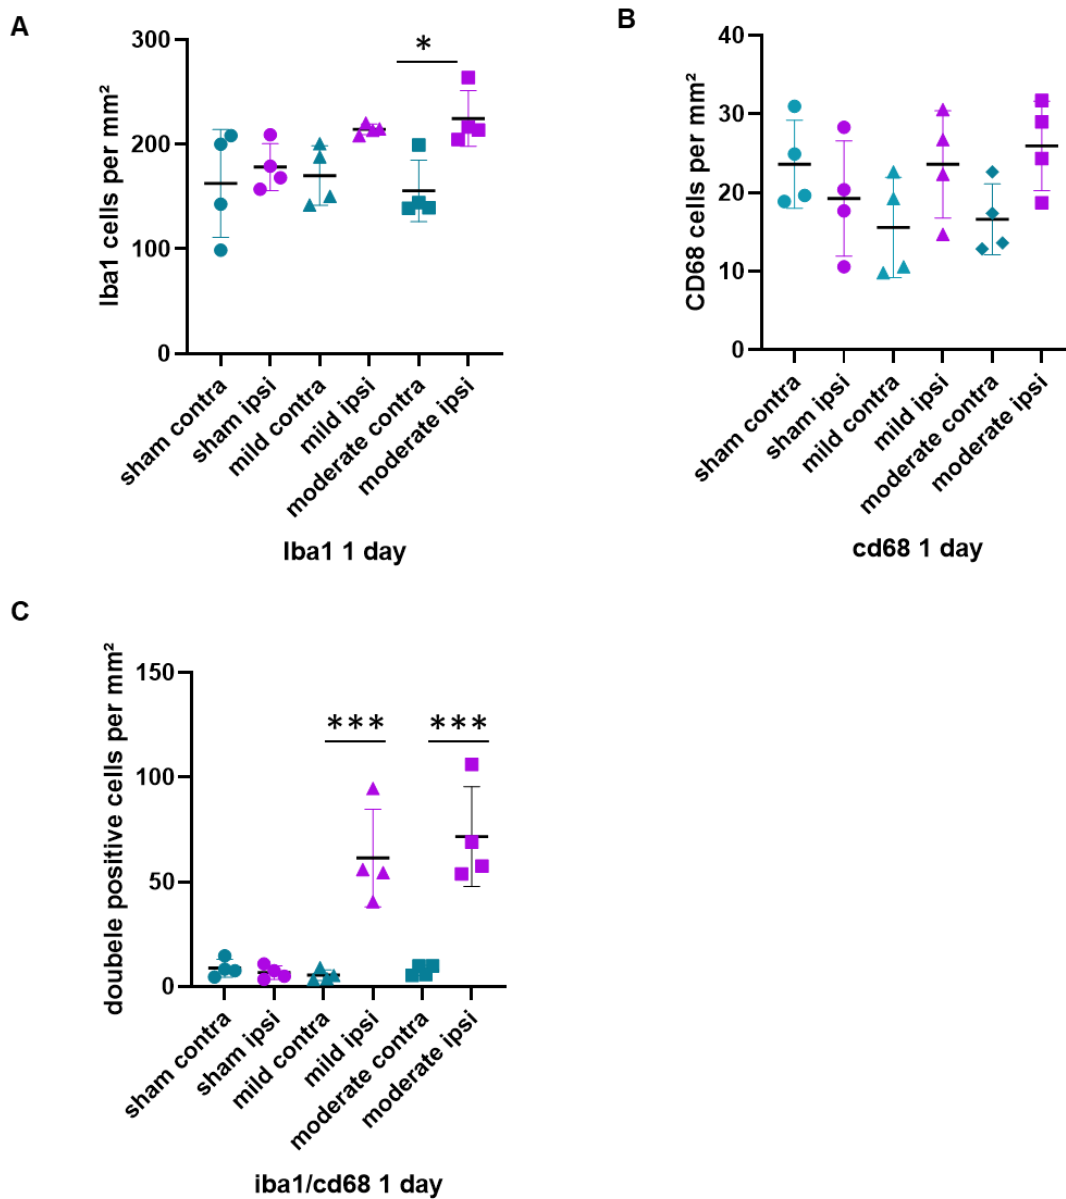

**Figure S5.** Quantification of microglial cell (A) and macrophages number (B), as well as microglial activation (C) in the cortex of mice subjected to sham conditions, miTBI or modTBI after 24h (n=4 per group).

\* $p < 0.05$ , \*\*\* $p < 0.001$  vs contralateral hemisphere, Ordinary one-way ANOVA with Tukey's multiple comparisons.

**A**

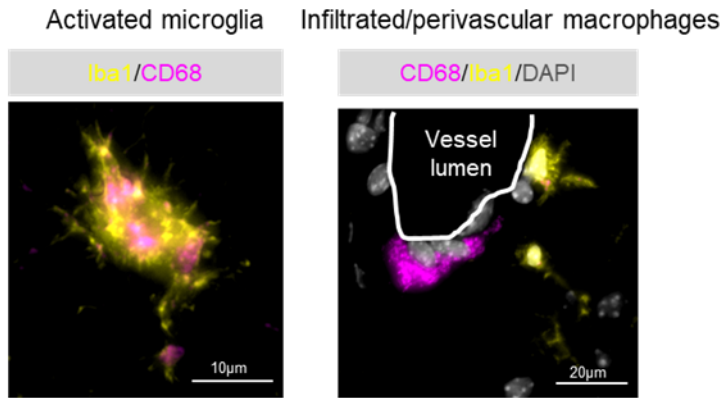

**B**

**IHC for cortical microgliosis**

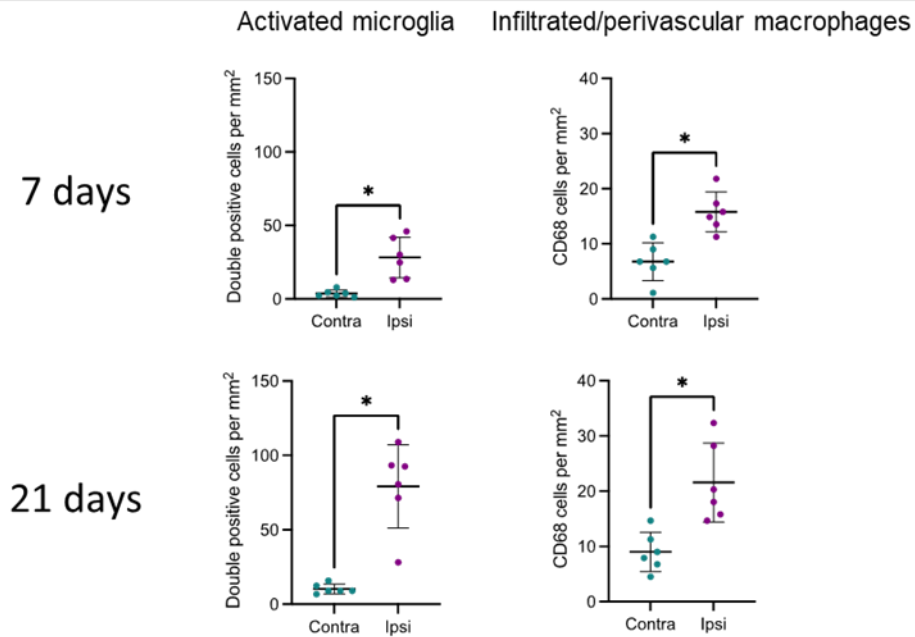

**C**

**IHC for hippocampal microgliosis**

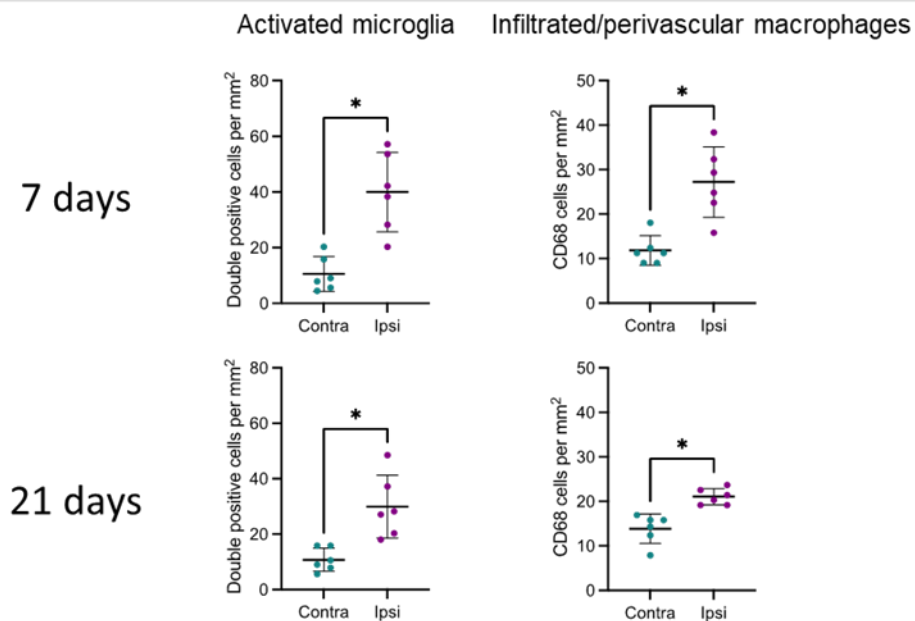

**Figure S6.** Mild TBI provokes a long-lasting microglial activation and infiltrated/perivascular macrophage recruitment. (A) Representative photomicrographs of an activated microglia (left panel, Iba1<sup>+</sup>CD68<sup>high</sup>) and an infiltrated/perivascular macrophage sitting next to a blood vessel (dotted line) (Iba1<sup>low</sup>CD68<sup>high</sup>). (B) Cortical microgliosis. Left: quantification of cortical Iba1<sup>+</sup>CD68<sup>high</sup> microglial cell numbers 7 (top) and 21 (bottom) days after miTBI. Right: quantification of cortical Iba1<sup>low</sup>CD68<sup>high</sup> macrophages 7 (top) and 21 (bottom) days after miTBI. (C) Hippocampal microgliosis. Left: quantification of hippocampal Iba1<sup>+</sup>CD68<sup>high</sup> microglial cell numbers 7 (top) and 21 (bottom) days after miTBI. Right: quantification of Iba1<sup>low</sup>CD68<sup>high</sup> macrophages 7 (top) and 21 (bottom) days after miTBI. Right: quantification of hippocampal Iba1<sup>low</sup>CD68<sup>high</sup> macrophages 7 (top) and 21 (bottom) days after miTBI. n=6 mice/group; \*p<0.05, \*\*p<0.01 vs contralateral hemisphere, Wilcoxon paired-test.
